# Supplementary material
Source: PubMed Central journal article supplement (PMC4267376)
Supplement: pnas.201411683SI.pdf [file pnas.201411683SI.pdf]

# Supporting Information

Guo et al. 10.1073/pnas.1411683111

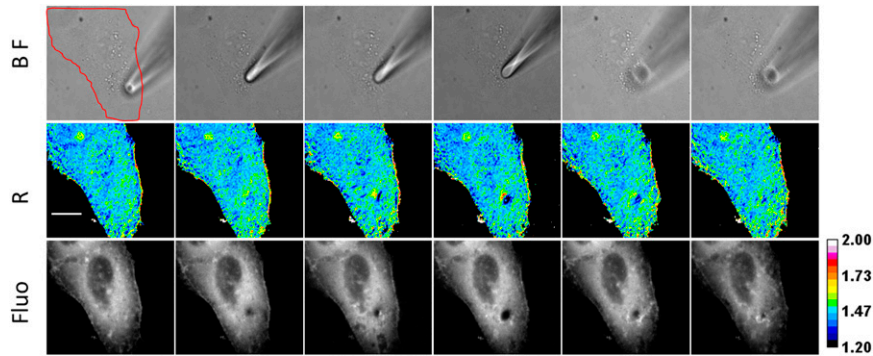

**Fig. S1.** MDCK cpA control cells pressed by micropipettes. Red line outlined the cell in bright-field image. BF, bright field; Fluo. fluorescence of FRET channel; R, anisotropy FRET ratio. *R* images are pseudocolored by an ImageJ 16-color map of 1.20–2.0. (Scale bar, 20  $\mu$ m.)

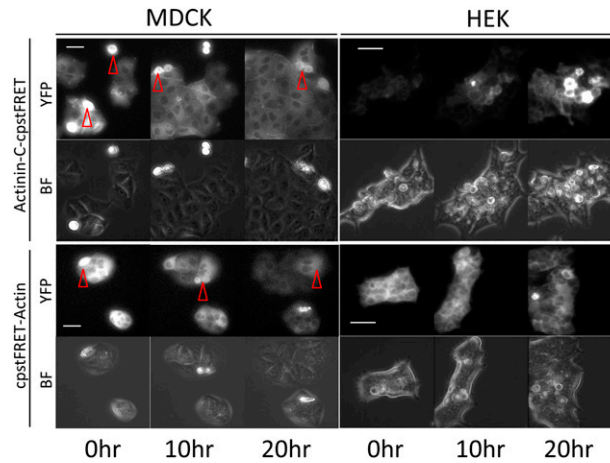

**Fig. S2.** Stable cell lines expressing cpstFRET–Actin and actinin–C–cpstFRET chimeras show unaffected cell physiology. A total of 13 cell lines were created in this work (Table S1). MDCK and HEK stable cell lines expressing actin and actinin constructs were cultured in media in 5% CO<sub>2</sub> chamber on a heated stage. A 20-h time lapse of each cell line was recorded to monitor the cell proliferation. YFP, YFP channel signal from cpVenus. Using the Zeiss Definite Focus, we monitored at least five cell colonies simultaneously. All cells went through mitosis and proliferation. Arrowheads point at dividing cells. (Scale bar, 50  $\mu$ m.)



**Table S2. Primers for gene constructs**

| Plasmid constructs                           | Vector   | Primers          | Direction | Sequence, 5'-3'                                        |
|----------------------------------------------|----------|------------------|-----------|--------------------------------------------------------|
| pEG-cpstFRET                                 | pEGFP-C1 | BamH1 cpstFRET   | Forward   | GTACCAGGATCCATGGGCGGCGTGCAG                            |
|                                              | pEGFP-C1 | Apa1 cpstFRET    | Reverse   | GGATCCCGGGCCCTTAACTACCGGTGGCAC                         |
| pET-cpVenus                                  | PET-52b+ | BamH1 cpVenus    | Forward   | GGTACCAGGATCCATGGGCGGCGTGCAGCTCGC                      |
|                                              | PET-52b+ | Sac1 cpVenus     | Reverse   | CCAGAGCGAGCTCGTCTCGATGTTGTGGCGGATC                     |
| pET-cpCerulean                               | PET-52b+ | BamH1 cpCerulean | Forward   | GTACCAGGATCCATGGGCGGCGTGCAGCTCGCCGACC                  |
|                                              | PET-52b+ | Sac1 cpCerulean  | Reverse   | GGCACCAGAGCGAGCTCGTCTCGATGTTGTGGCGGATC                 |
| pET-cpstFRET                                 | pET-52b+ | BamH1 cpstFRET   | Forward   | GGTACCAGGATCCATGGGCGGCGTGCAGCTCGCCG                    |
|                                              | pET-52b+ | Sac1 cpstFRET    | Reverse   | CCAGAGCGAGCTCGTCTCGATGTTGTGGCG                         |
| pEG-Actinin                                  | pEGFP-C1 | Nhe1 Actinin     | Forward   | AGATCCGCTAGCATGGACCATTATGATTCTCAGCAAACC                |
|                                              | pEGFP-C1 | Kpn1 Actinin     | Reverse   | GCCCGCGGTACCTTAGAGGTCACTCTCGCCGTACAGC                  |
| pEG-Actinin-M-cpstFRET                       | pEGFP-C1 | Age1 cpstFRET    | Forward   | GAGAACC GGACCGGTATGGGCGGCGTGCAGCTCGCCG                 |
|                                              | pEGFP-C1 | Not1 cpstFRET    | Reverse   | CGGGCACGGCCGCTACTACCGGTGGCACCAGAGCGAGCTCG              |
| pEG-Actinin-C-cpstFRET                       | pEGFP-C1 | Age1 cpstFRET    | Forward   | GTGACCTACCGGTATGGGCGGCGTGCAGCTCGCCGACCCTACC            |
|                                              | pEGFP-C1 | Not1 cpstFRET    | Reverse   | GTACCTTAGCGGCGGCTACTACCGGTGGCACCAGAGCGAG               |
| pEG-cpstFRET- $\beta$ -Actin                 | pEGFP-C1 | Sac1 Actin       | Forward   | CGAGGACGAGCTCGGTGGGGGAGGAGGTATGGATGATGATATCGCC-GCGCTCG |
|                                              | pEGFP-C1 | Apa1 Actin       | Reverse   | GTGGATCCCGGGCCCTTAGAAGCATTGCGGTGGACGATGGAGGGGC         |
| pEG- $\beta$ -Actin-cpstFRET- $\beta$ -Actin | pEGFP-C1 | Nhe1 Actin       | Forward   | CAGATCCGCTAGCATGGATGATGATATCGCCGCGCTCGTCTCGAC          |
|                                              | pEGFP-C1 | Kpn1 Actin       | Reverse   | GATCCTGGTACCCCGCCTCTCCGAAGCATTGCGGTGGACGATGGAG-GGGCCG  |

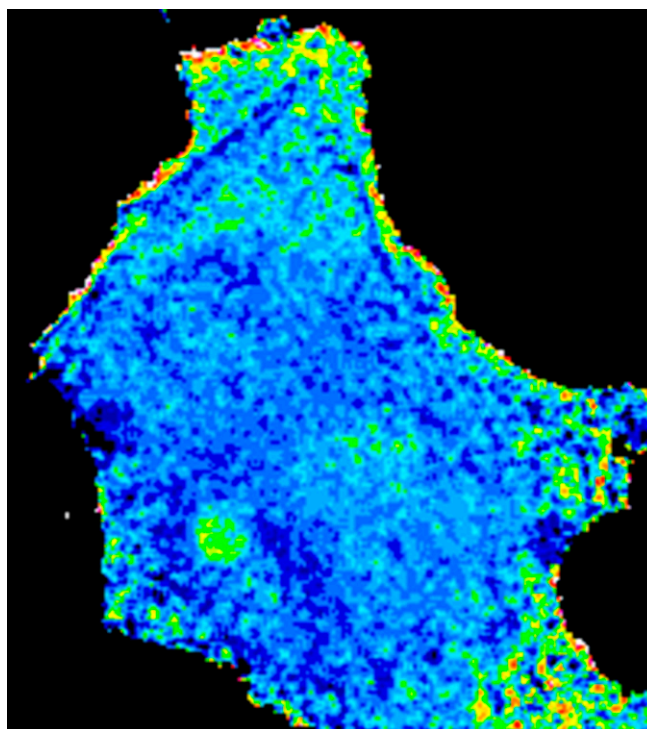

**Movie S1.** Anisotropy ratio  $R$  video of cpA-expressing MDCK cells challenged by anisotonic osmotic pressure. The video is presented with a 16-color map of ImageJ with the same range as in Fig. 3. Inset words show the time points of administration of distilled water and exchanging back to saline.

[Movie S1](#)

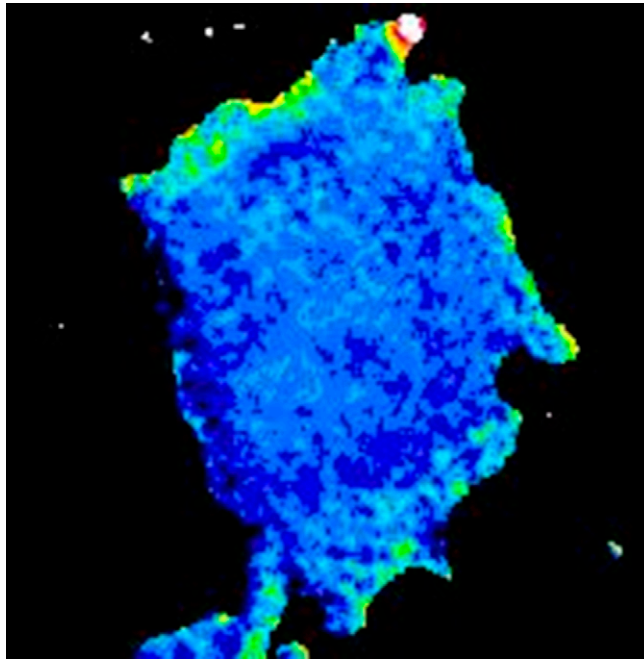

**Movie S2.** Anisotropy ratio  $R$  video of cpA-expressing HEK cells treated by 5  $\mu\text{M}$  cytochalasin D. The video is presented with a 16-color map of ImageJ with the same range as in Fig. 3. Inset words show the time points of administration of the drug and washoff.

[Movie S2](#)

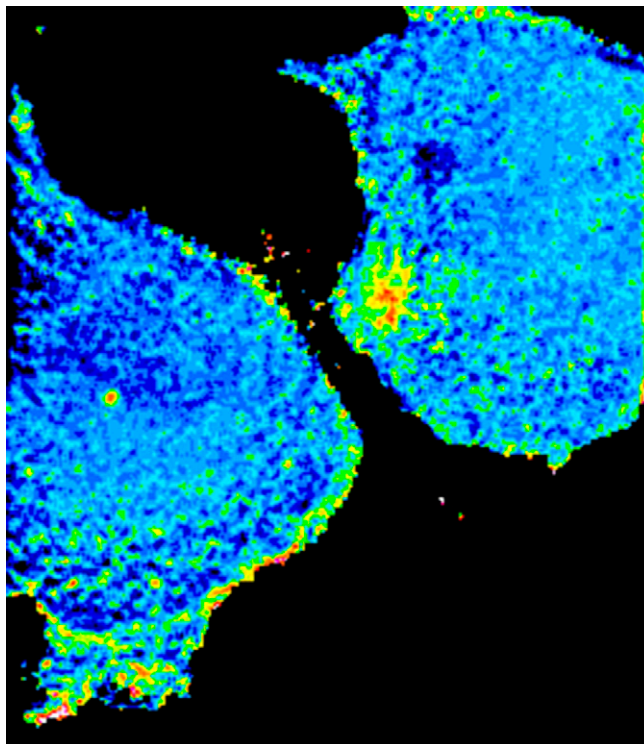

**Movie S3.** Anisotropy ratio  $R$  video of cpA-expressing HEK cells under the treatments of the 10 mM of caffeine. The video is presented with a 16-color map of ImageJ with the same range as in Fig. 3. Inset words show the time points of administration of the drug and washoff.

[Movie S3](#)

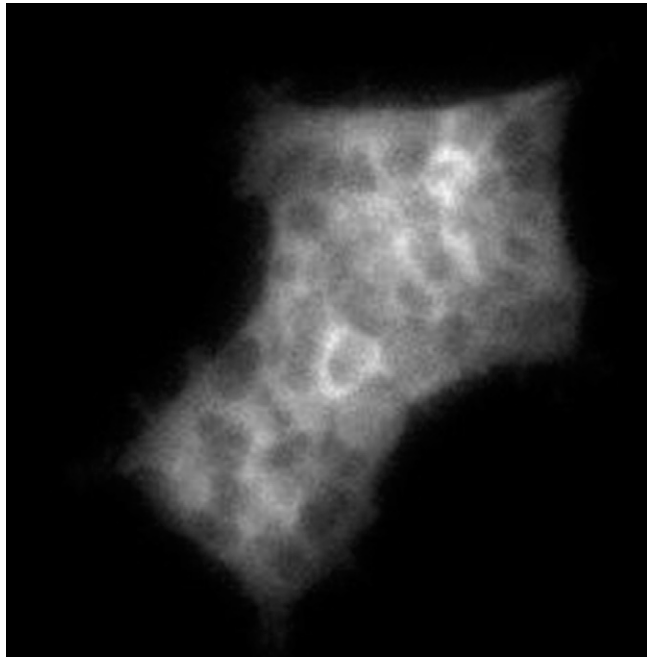

**Movie S4.** A 20-h time-lapse sequence video of AcpA-expressing HEK cells going through division and proliferation. The video is presented with the YFP channel from cpVenus.

[Movie S4](#)

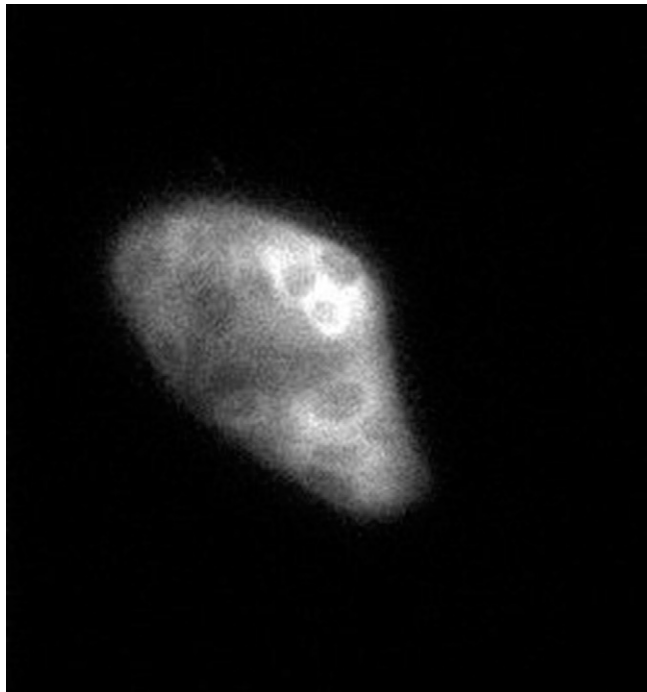

**Movie S5.** A 20-h time-lapse sequence video of AcpA-expressing MDCK cells going through division and proliferation. The video is presented with the YFP channel from cpVenus.

[Movie S5](#)
